# Supplementary material for: High-temperature supercapacitor with a proton-conducting metal pyrophosphate electrolyte
Source: PubMed Central journal article supplement (PMC4298720; doi:10.1038/srep07903), 2015-01-20
Supplement: srep07903-s1.pdf [file srep07903-s1.pdf]

Supplementary Information

**High-temperature supercapacitor with a proton-conducting metal pyrophosphate  
electrolyte**

Takashi Hibino,<sup>1,\*</sup> Kazuyo Kobayashi,<sup>1</sup> Masahiro Nagao,<sup>1</sup> and Shinji Kawasaki<sup>2</sup>

<sup>1</sup>Graduate School of Environmental Studies, Nagoya University, Furo-cho, Chikusa-ku,  
Nagoya 464-8601, Japan

<sup>2</sup>Graduate School of Engineering, Nagoya Institute of Technology, Gokiso-cho, Showa-ku,  
Nagoya 466-8555, Japan

\*Corresponding author, E-mail address: hibino@urban.env.nagoya-u.ac.jp, Tel:  
+81-52-789-4888, Fax: +81-52-789-4894\*

Figure S1. He penetration rate through the SIPO composite as a function of membrane thickness.

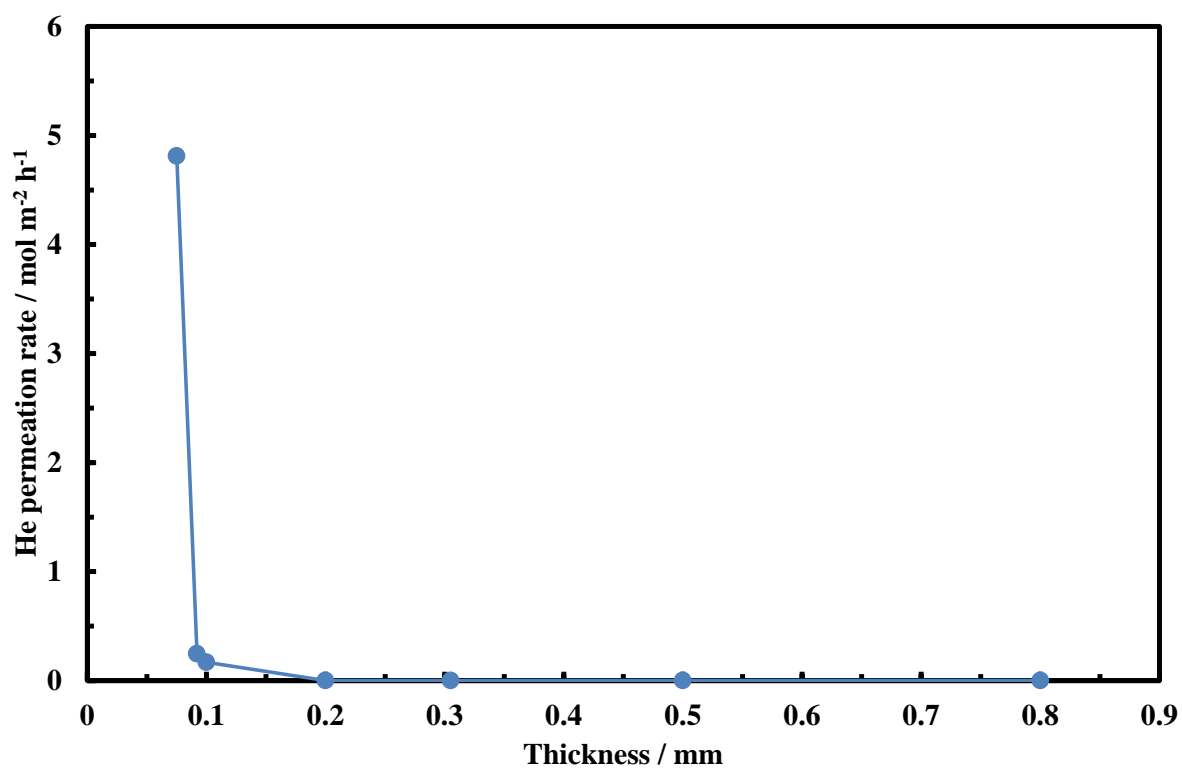

The helium permeability of the membrane sample was determined at 150 °C by preparing two chambers separated by the membrane. Pure helium was supplied to one chamber and argon to the other at a flow rate of 60 mL min<sup>-1</sup>; the amount of helium that entered the argon chamber was monitored using a gas chromatograph (Shimadzu, GC-8A) with a thermal conductivity detector.

Figure S2. SEM images before and after immersion of the electrode ionomer into 105%  $\text{H}_3\text{PO}_4$ .

a

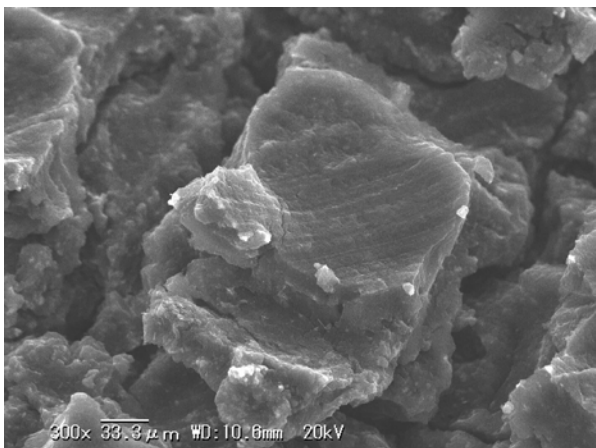

b

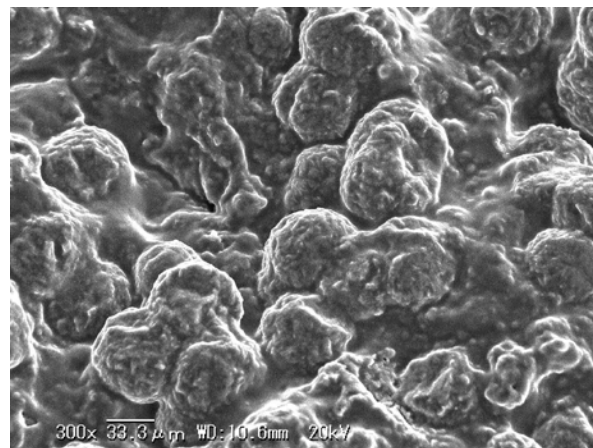

The carbon particles are homogeneously and intimately covered with 105%  $\text{H}_3\text{PO}_4$ , which suggests that the wettability between the two media is good, at least for the external surface of the carbon particles.

Figure S3. Galvanostatic charge-discharge curve measured for pure untreated Maxsorb with a current density of  $3.6 \text{ A g}^{-1}$  at  $200 \text{ }^\circ\text{C}$ .

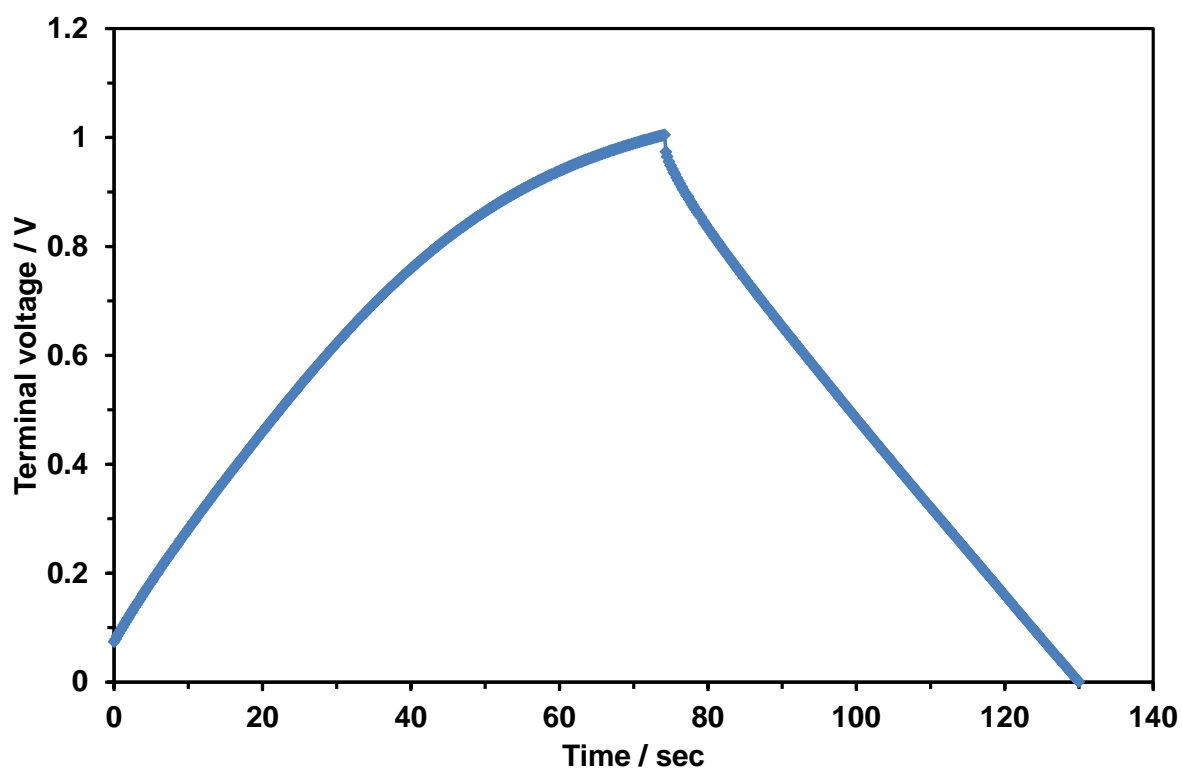

Pure untreated Maxsorb was used as the carbon electrode. The capacitance ( $C$ ) was calculated according to:

$$C = \frac{I \times t}{\Delta V \times w}$$

where  $I$  is the discharge current,  $t$  is the discharge time,  $\Delta V$  is the voltage difference of discharge, and  $w$  is the total mass of the two carbon electrodes. The carbon sample showed a capacitance of  $173 \text{ F g}^{-1}$ .

Figure S4. XPS spectra for the untreated and HNO<sub>3</sub>-treated Maxsorb.

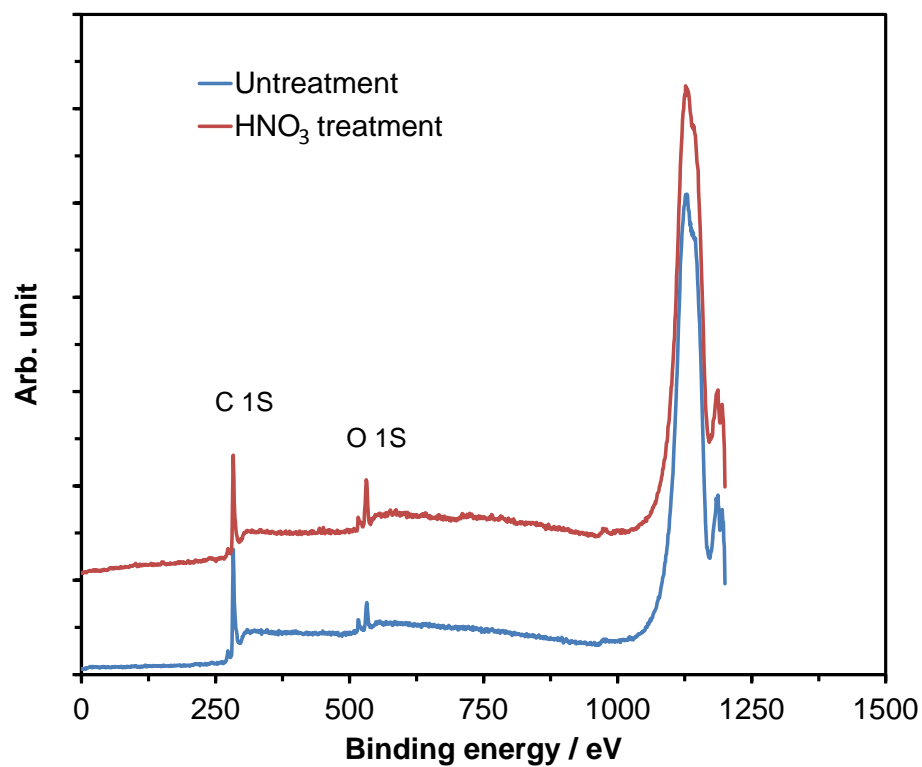

The O/C atomic ratio increased from 0.044 to 0.066 by HNO<sub>3</sub> treatment at room temperature, which is consistent with the weight increase of the carbon sample after modification.

Figure S5. Raman spectra for the untreated and HNO<sub>3</sub>-treated Maxsorb.

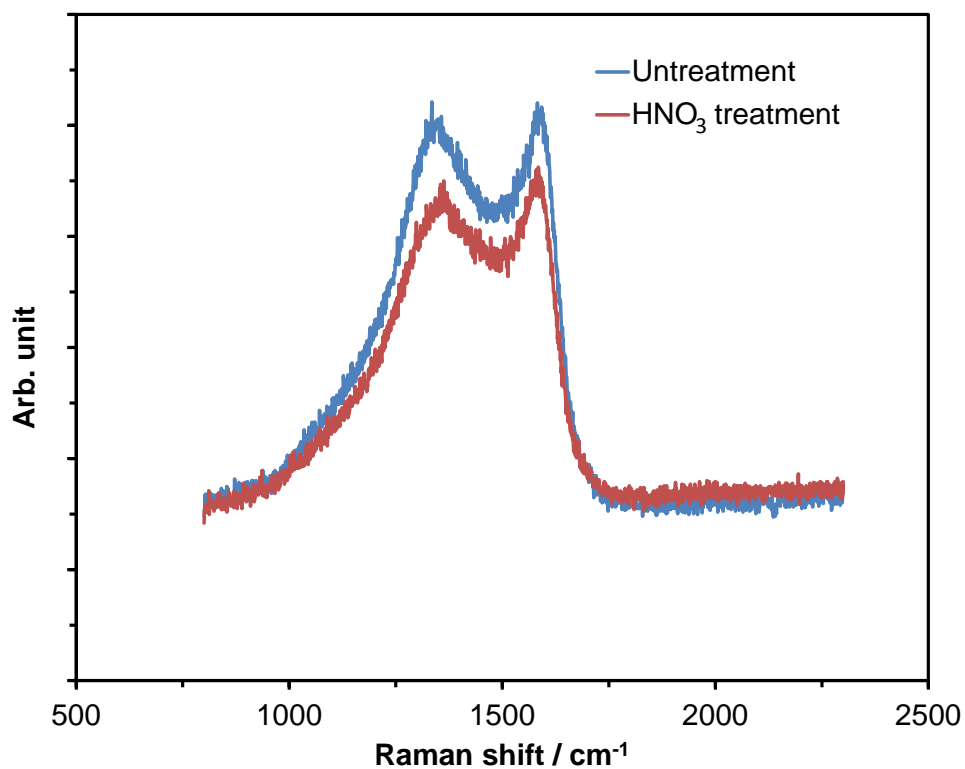

The Raman spectra showed no difference in the intensity ratio of the D-band (*ca.* 1340 cm<sup>-1</sup>) to the G-band (*ca.* 1580 cm<sup>-1</sup>) between the two samples, which implies that the carbon sample did not undergo significant structural deformation.

Figure S6. EIS spectra for the capacitor with the SAPO-PTFE composite electrolyte, 105%  $\text{H}_3\text{PO}_4$  electrode ionomer, and  $\text{HNO}_3$ -activated carbon measured at various temperatures.

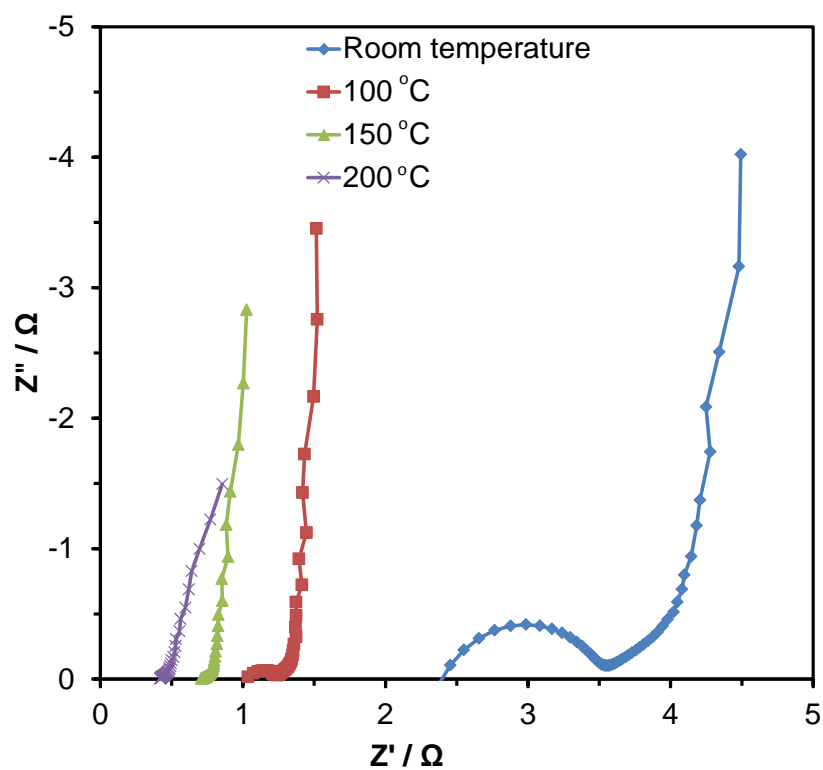

The measured Nyquist plots showed ideal capacitive behavior at low frequencies with near vertical lines parallel to the imaginary axis. However, a slight deviation from the theoretical  $90^\circ$  vertical line was observed for the capacitor at  $200^\circ\text{C}$ , which indicates that the carbon electrode does not function as a planar electrode under such conditions.

Figure S7. Galvanostatic charge-discharge curves for a capacitor with the SAPO-PTFE composite electrolyte, 105% H<sub>3</sub>PO<sub>4</sub> electrode ionomer, and HNO<sub>3</sub>-activated carbon measured at various voltages, where the current density was set at 4.5 A g<sup>-1</sup>.

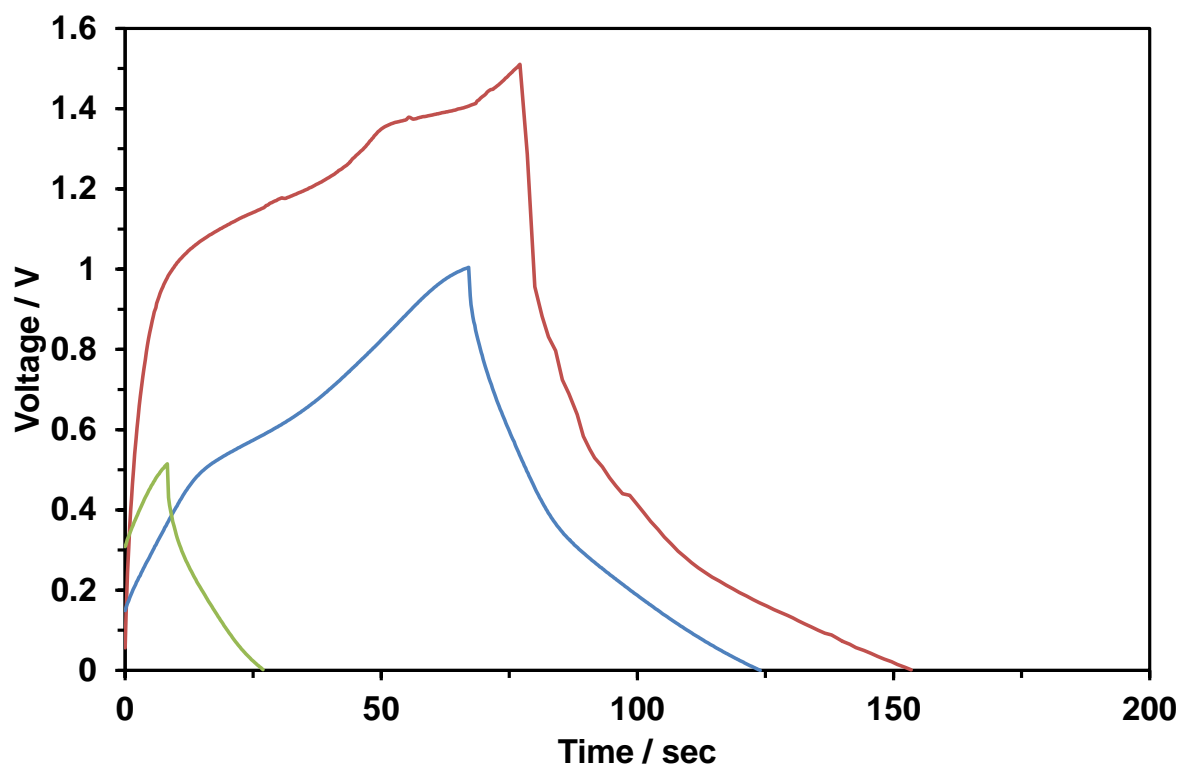

The cell voltage cannot reach 2 V at 4.5 A g<sup>-1</sup>; therefore, the corresponding data is not shown in this figure. The voltage of the capacitor charged to 1.5 V decreased rapidly from 1.5 to approximately 1 V over time, which suggests that a faradaic reaction proceeds simultaneously with the formation of the EDL during cell charge.
